# Supplementary material
Source: publisher site journal article supplement (http://edge.sagepub.com/sites/default/files/bachman5e_appendix.zip)
Supplement: Supplementary file 1 [file bachman5e_appendix.zip]

Archive with 6 entries (6 files):
- Bachman5e_Appendix/BACHMAN_FUNDAMENTALS_5E_APPENDICE_A_ONLINE.pdf
- Bachman5e_Appendix/BACHMAN_FUNDAMENTALS_5E_APPENDICE_B_ONLINE.pdf
- Bachman5e_Appendix/BACHMAN_FUNDAMENTALS_5E_APPENDICE_C_ONLINE.pdf
- Bachman5e_Appendix/BACHMAN_FUNDAMENTALS_5E_APPENDICE_D_ONLINE.pdf
- Bachman5e_Appendix/BACHMAN_FUNDAMENTALS_5E_APPENDICE_E_ONLINE.pdf
- Bachman5e_Appendix/BACHMAN_FUNDAMENTALS_5E_APPENDICE_F_ONLINE.pdf
